# Supplementary material for: Mesoporous Mn–Zr composite oxides with a crystalline wall: synthesis, characterization and application
Source: Royal Society of Chemistry journal article supplement (doi:10.1039/c4dt03835e), 2015-01-01
Supplement: c4dt03835e1.pdf [file c4dt03835e1.pdf]

## Supporting Information

### Mesoporous Mn-Zr composite oxides with crystalline wall: synthesis, characterization and application

Zhichao Miao<sup>a,b</sup>, Huahua Zhao<sup>a</sup>, Jian Yang<sup>a</sup>, Jun Zhao<sup>a</sup>, Huanling Song<sup>a,c</sup>, Lingjun

Chou<sup>a,c</sup> \*

<sup>a</sup> State Key Laboratory for Oxo Synthesis and Selective Oxidation, Lanzhou Institute of Chemical Physics, Chinese Academy of Sciences, Lanzhou 730000, People's Republic of China.

<sup>b</sup> University of Chinese Academy of Sciences, Beijing 100049, People's Republic of China.

<sup>c</sup> Suzhou Institute of Nano-Tech and Nano-Bionics, Chinese Academy of Sciences, Suzhou 215123, People's Republic of China.

---

\* Corresponding author: e-mail: [ljzhou@licp.cas.cn](mailto:ljzhou@licp.cas.cn) (L. J. Chou)  
Tel: +86 0931 4968066; Fax: +86 0931 4968129

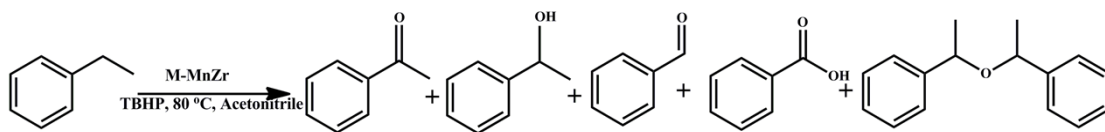

**Figure S1.** Liquid phase oxidation of ethylbenzene over the M-ZrMn catalyst.

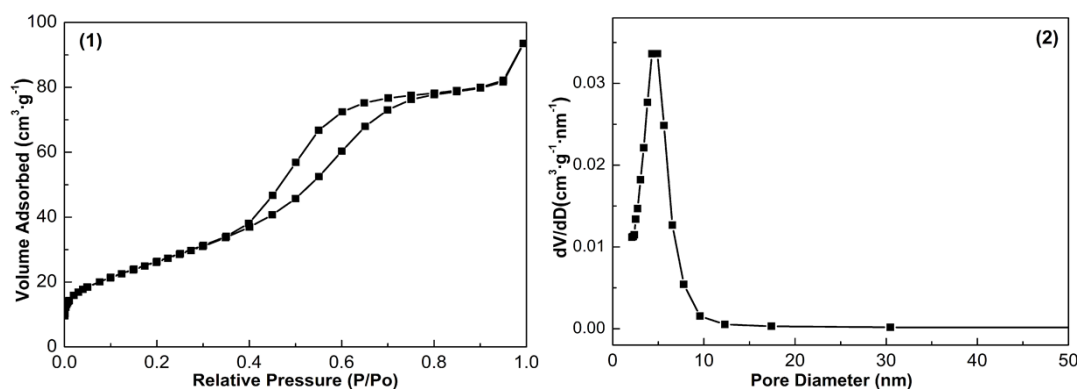

**Figure S2.** (1)  $N_2$  physisorption isotherms and (2) pore size distribution of M-10MnZr-used

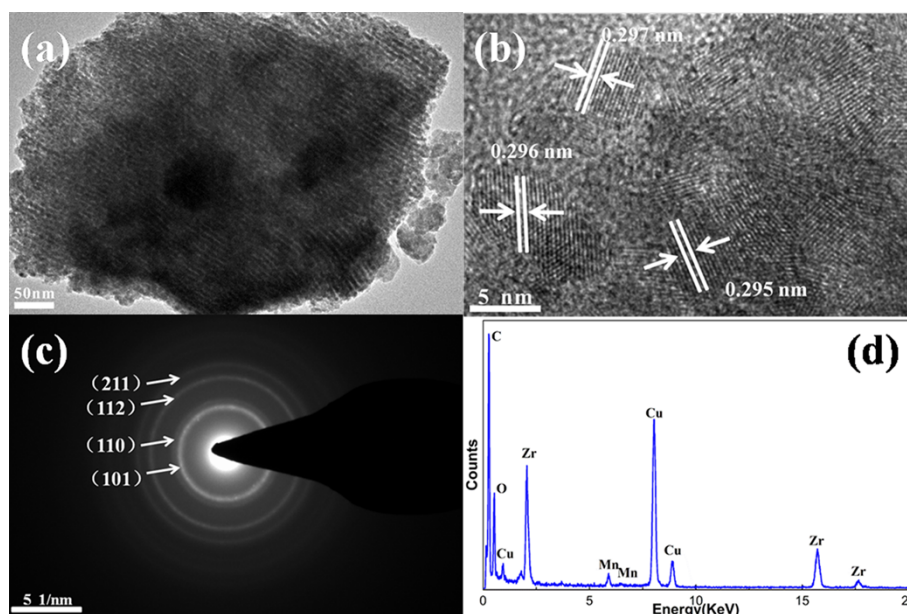

**Figure S3.** (a) TEM image, (b) HRTEM image, (c) SAED pattern and (d) EDX measurement of M-10MnZr-used.
